# Supplementary material for: The role of PLLA-g-montmorillonite nanohybrids in the acceleration of the crystallization rate of a commercial PLA
Source: Royal Society of Chemistry journal article supplement (doi:10.1039/c6ce02005d), 2016-01-01
Supplement: c6ce02005d1.pdf [file c6ce02005d1.pdf]

## Supporting Information

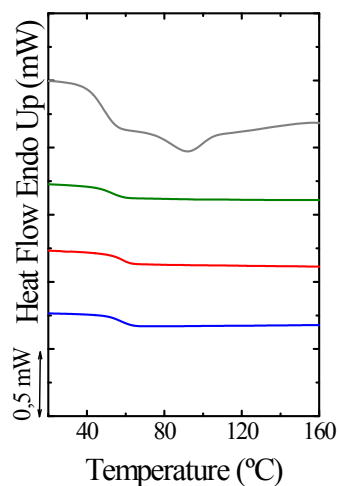

Figure S1. DSC cooling scans at 10 °C/min

Table S1. Data obtained from the Lauritzen and Hoffman fits for PLOM data

|                  | $G_0$ (cm/s)      | $K_g^G$ (K <sup>2</sup> ) | $\sigma$ (erg/cm <sup>2</sup> ) | $\sigma_e$ (erg/cm <sup>2</sup> ) | $q$ (erg)             | $R^2$  |
|------------------|-------------------|---------------------------|---------------------------------|-----------------------------------|-----------------------|--------|
| PLA              | $3.47 \cdot 10^3$ | $4.61 \cdot 10^5$         | 6.06                            | 266.61                            | $1.22 \cdot 10^{-12}$ | 0.9940 |
| PLA/CI30B        | $3.57 \cdot 10^3$ | $4.64 \cdot 10^5$         | 6.06                            | 268.80                            | $1.23 \cdot 10^{-12}$ | 0.9964 |
| PLA/CI30B-g-PLLA | $5.13 \cdot 10^2$ | $3.76 \cdot 10^5$         | 6.06                            | 217.42                            | $9.98 \cdot 10^{-12}$ | 0.9987 |
| PLA/PLL          | $3.22 \cdot 10^2$ | $3.16 \cdot 10^5$         | 6.06                            | 182.85                            | $8.39 \cdot 10^{-12}$ | 0.9908 |

Table S2. Data obtained from the Lauritzen and Hoffman fits for DSC data

|                  | $1/\tau_0$ (1/s)  | $K_g^\tau$ (K <sup>2</sup> ) | $\sigma$ (erg/cm <sup>2</sup> ) | $\sigma_e$ (erg/cm <sup>2</sup> ) | $Q$ (erg)             | $R^2$  |
|------------------|-------------------|------------------------------|---------------------------------|-----------------------------------|-----------------------|--------|
| PLA              | $1.37 \cdot 10^8$ | $5.83 \cdot 10^5$            | 6.06                            | 337.37                            | $1.55 \cdot 10^{-12}$ | 0.9994 |
| PLA/CI30B        | $2.25 \cdot 10^7$ | $5.09 \cdot 10^5$            | 6.06                            | 294.49                            | $1.35 \cdot 10^{-12}$ | 0.9982 |
| PLA/CI30B-g-PLLA | $6.36 \cdot 10^6$ | $4.31 \cdot 10^5$            | 6.06                            | 249.52                            | $1.15 \cdot 10^{-12}$ | 0.9922 |
| PLA/PLL          | $3.11 \cdot 10^6$ | $3.76 \cdot 10^5$            | 6.06                            | 217.72                            | $9.99 \cdot 10^{-12}$ | 0.9600 |

Table S3. Avrami theory parameters

| Sample           | Tc (°C) | n         | K (min <sup>-n</sup> ) | $\tau_{1/2 \text{ fit}}$ (min) | $\tau_{1/2 \text{ Exp}}$ (min) | R <sup>2</sup> |
|------------------|---------|-----------|------------------------|--------------------------------|--------------------------------|----------------|
| PLA              | 100     | 2.51      | 1.97 E-04              | 25.9                           | 24.6                           | 0.9999         |
|                  | 102     | 2.63      | 1.81 E-04              | 22.9                           | 21.9                           | 0.9999         |
|                  | 104     | 2.65      | 2.39 E-04              | 20.2                           | 19.4                           | 0.9996         |
|                  | 106     | 2.33      | 7.00 E-04              | 19.2                           | 18.1                           | 0.9999         |
|                  | 108     | 2.5       | 6.00 E-04              | 16.7                           | 15.8                           | 0.9995         |
|                  | 110     | 2.68      | 4.21 E-04              | 15.8                           | 15.3                           | 0.9999         |
|                  | 112     | 2.7       | 3.98 E-04              | 15.8                           | 15.0                           | 0.9993         |
|                  | 114     | 2.84      | 3.06 E-04              | 15.1                           | 14.7                           | 0.9998         |
|                  | 116     | 2.97      | 2.12 E-04              | 15.1                           | 14.8                           | 0.9998         |
|                  | 118     | 3.12      | 1.26 E-04              | 15.8                           | 15.5                           | 0.9997         |
|                  | 120     | 3.03      | 1.40 E-04              | 16.6                           | 16.3                           | 0.9998         |
|                  | 122     | 3.23      | 6.01 E-05              | 18.0                           | 17.6                           | 0.9997         |
|                  | 124     | 3.24      | 4.47 E-05              | 19.7                           | 19.3                           | 0.9997         |
|                  | 126     | 3.3       | 2.94 E-05              | 21.1                           | 21.2                           | 1.0000         |
|                  | 128     | 3.59      | 9.73 E-06              | 22.4                           | 22.5                           | 1.0000         |
| 130              | 3.28    | 1.10 E-05 | 29.0                   | 28.3                           | 1.0000                         |                |
| PLA/CI30B        | 100     | 2.68      | 1.84 E-04              | 21.5                           | 20.433                         | 0.9998         |
|                  | 102     | 3.08      | 9.13 E-05              | 18.2                           | 18.3                           | 1              |
|                  | 104     | 2.88      | 2.55 E-04              | 15.6                           | 15.316                         | 0.9999         |
|                  | 106     | 3.08      | 1.94 E-04              | 14.2                           | 14.3                           | 0.9998         |
|                  | 108     | 3.24      | 1.51 E-04              | 13.5                           | 13.483                         | 1              |
|                  | 110     | 3.12      | 3.06 E-04              | 11.9                           | 11.9                           | 1              |
|                  | 112     | 3.03      | 5.11 E-04              | 10.8                           | 10.767                         | 1              |
|                  | 114     | 3.1       | 4.64 E-04              | 10.5                           | 10.366                         | 0.9999         |
|                  | 116     | 3.33      | 3.17 E-04              | 10.1                           | 10.166                         | 1              |
|                  | 118     | 3.3       | 3.15 E-04              | 10.3                           | 10.267                         | 1              |
|                  | 120     | 3.32      | 3.39 E-04              | 10.0                           | 10.083                         | 1              |
|                  | 122     | 3.4       | 2.34 E-04              | 10.5                           | 10.633                         | 1              |
|                  | 124     | 3.43      | 1.8 E-04               | 11.1                           | 11.25                          | 1              |
|                  | 126     | 3.29      | 1.86 E-04              | 12.1                           | 12.166                         | 0.9999         |
|                  | 128     | 3.29      | 1.4 E-04               | 13.3                           | 13.3                           | 0.9999         |
| 130              | 3.35    | 7.04 E-05 | 15.5                   | 15.433                         | 0.9997                         |                |
| 132              | 3.61    | 2.25 E-05 | 17.5                   | 17.95                          | 1                              |                |
| 134              | 3.69    | 8.72 E-06 | 21.3                   | 22.267                         | 0.9997                         |                |
| PLA/CI30B-g-PLLA | 100     | 2.73      | 9.05 E-03              | 4.9                            | 5.033                          | 1              |
|                  | 102     | 2.66      | 1.47 E-02              | 4.3                            | 4.366                          | 1              |
|                  | 104     | 2.6       | 2.4 E-02               | 3.6                            | 3.683                          | 0.9998         |
|                  | 106     | 2.71      | 3.03 E-02              | 3.2                            | 3.217                          | 0.9999         |
|                  | 108     | 2.7       | 4.46 E-02              | 2.8                            | 2.767                          | 0.9998         |
|                  | 110     | 2.73      | 5.20 E-02              | 2.6                            | 2.566                          | 0.9998         |
|                  | 112     | 2.79      | 5.73 E-02              | 2.4                            | 2.433                          | 0.9999         |
|                  | 114     | 2.7       | 6.82 E-02              | 2.4                            | 2.333                          | 0.9998         |
|                  | 116     | 2.65      | 7.22 E-02              | 2.3                            | 2.3                            | 0.9997         |
|                  | 118     | 2.65      | 7.07 E-02              | 2.4                            | 2.316                          | 0.9997         |
|                  | 120     | 2.64      | 6.49 E-02              | 2.5                            | 2.4                            | 0.9997         |
|                  | 122     | 2.61      | 5.97 E-02              | 2.6                            | 2.483                          | 0.9997         |
|                  | 124     | 2.55      | 5.54 E-02              | 2.7                            | 2.6                            | 0.9996         |
|                  | 126     | 2.51      | 4.65 E-02              | 2.9                            | 2.833                          | 0.9996         |
|                  | 128     | 2.49      | 3.73 E-02              | 3.2                            | 3.116                          | 0.9995         |
| PLA/PLLA         | 84      | 2.31      | 7.61 E-03              | 7.1                            | 6.76                           | 0.9995         |
|                  | 86      | 2.78      | 4.0E-03                | 6.4                            | 6.28                           | 0.9999         |
|                  | 88      | 2.63      | 8.4E-03                | 5.4                            | 5.26                           | 0.998          |
|                  | 90      | 2.89      | 9.67E-03               | 4.4                            | 4.5                            | 1              |
|                  | 92      | 2.64      | 2.65E-02               | 3.4                            | 3.61                           | 1              |
|                  | 94      | 2.56      | 4.48E-02               | 2.9                            | 3.1                            | 1              |
|                  | 96      | 2.46      | 8.21E-02               | 2.4                            | 2.55                           | 0.9999         |
|                  | 98      | 2.23      | 1.73E-01               | 1.9                            | 1.96                           | 1              |
|                  | 100     | 2.17      | 2.30E-01               | 1.7                            | 1.8                            | 1              |
